# Supplementary material
Source: PubMed Central journal article supplement (PMC3219054)
Supplement: supp_en.2010-0791_en-10-0791Table_1.pdf [file supp_en.2010-0791_en-10-0791Table_1.pdf]

**Supplemental Table 1: qPCR primer sequences**

| species | gene                        | primer        | sequence 5' ⇒ 3'            | size (bp) |
|---------|-----------------------------|---------------|-----------------------------|-----------|
| mouse   | CRFR1 <sup>a</sup>          | qmCRFR1.fwu1  | CTTCTCCTTCTGGGGCTGA         | 124       |
|         |                             | qmCRFR1.rvu1  | AGGTGCCAATGAGGTCCAC         |           |
| mouse   | CRFR2                       | qmCRFR2.fwu1  | AAGTGCACGAGGGCAATG          | 69        |
|         |                             | qmCRFR2.rvu1  | TGGTGACCACAAAATAGTTGAAG     |           |
| mouse   | CRFR2 $\alpha$ <sup>b</sup> | qmCRFR2a.fw   | GCCGAAGAGCTGCTCCTGGA        | 91        |
|         |                             | qmCRFR2a.rv   | TCCCGATCTGGTCCAAGGT         |           |
| mouse   | CRFR2 $\beta$ <sup>c</sup>  | qmCRFR2b.fw   | GGGCTTTACCTTGGTGGGTAG       | 294       |
|         |                             | qmCRFR2b.rv   | CTGAAAAAATCCAGTTGTGGTC      |           |
| mouse   | GLP-1R                      | qmGLP-1R.fwu1 | CCCTGGGCCAGTAGTGTG          | 88        |
|         |                             | qmGLP-1R.rvu1 | GCAGGCTGGAGTTGTCCTTA        |           |
| mouse   | GIPR                        | qmGIPR.fwu1   | GGGATCTTGGAGAGACCACA        | 105       |
|         |                             | qmGIPR.rvu1   | CCCACGGTATACATGATCTGC       |           |
| mouse   | Ucn 3                       | qmUcn 3.fwu1  | GCTGTGCCCTCGACCT            | 71        |
|         |                             | qmUcn 3.rvu1  | TGGGCATCAGCATCGCT           |           |
| mouse   | HPRT                        | qmHPRT.fwu    | TCCTCCTCAGACCGCTTTT         | 90        |
|         |                             | qmHPRT.rvu    | CCTGGTTCATCATCGCTAATC       |           |
| rat     | CRFR1                       | qrCRFR1.fwu   | TCCGCTACAACACGACAAAC        | 94        |
|         |                             | qrCRFR1.rvu   | AGAATCTCCTGGCACTCAGAA       |           |
| rat     | CRFR2                       | qrCRFR2.fwu1  | TGAACCCATTTTGGATGACA        | 67        |
|         |                             | qrCRFR2.rvu1  | GTTGATGATGAGGGCGATTC        |           |
| rat     | CRFR2 $\beta$ <sup>d</sup>  | qrCRFR2b.fw   | ACTCTCTGCTCCCACTGCTC        | 152       |
|         |                             | qrCRFR2b.rv   | GATCTGGTCCAAGGTCGTGT        |           |
| rat     | HPRT                        | qrHPRT.fwu2   | GGTCCATTCCCTATGACTGTAGATTTT | 126       |
|         |                             | qrHPRT.rvu2   | CAATCAAGACGTTCCTTCCAGTT     |           |
| human   | CRFR1                       | qhCRFR1.fw    | CCCTCTGGGATGTCCGTAG         | 115       |
|         |                             | qhCRFR1.rv    | GTTCAGCCCCAGAAGGAGA         |           |
| human   | CRFR2                       | qhCRFR2.fw    | GTGCCTCTTCCTCTTCATCG        | 164       |
|         |                             | qhCRFR2.rv    | TGATCAGGAGCACGAGAATG        |           |
| human   | CRFR2 $\alpha$ <sup>e</sup> | qhCRFR2a.fw   | GACGCGGCACTGCTCCACAG        | 233       |
|         |                             | qhCRFR2a.rv   | GCATTCCGGGTCGTGTTGT         |           |
| human   | CRFR2 $\beta$ <sup>f</sup>  | Hs01120856_m1 |                             | 61        |
| human   | HPRT                        | qhHPRT.fwu1   | GACCAGTCAACAGGGACAT         | 95        |
|         |                             | qhHPRT.rvu1   | GTGTCAATTATATCTTCCACAATCAAG |           |

<sup>a</sup> All primers designed using the universalprobelibrary online primer design feature (Roche Diagnostics, Indianapolis, IN), unless indicated otherwise.

<sup>b</sup> Primers from Jin TE *et al.*, Mol Cells, 2008, 26:243-249.

<sup>c</sup> Primers based on Chen *et al.*, Mol Endocrinol 2005 19(2):441–458.

<sup>d</sup> Designed with Primer 3 software, <http://frodo.wi.mit.edu/primer3/>

<sup>e</sup> Primers from Kimura *et al.* J Clin Endocrinol Metab (2002) 87:340-346.

<sup>f</sup> Taqman gene expression assay with Taqman Universal PCR master mix (Applied Biosystems, Foster City, CA).
